# Supplementary material
Source: Springer Nature journal article supplement (https://www.springermedizin.de/resource/supplementary/12888_2001_10_MOESM3_ESM.pdf/9481592)

MOVING AVERAGE OF RATES

(PER 100,000 POPULATION PER YEAR)

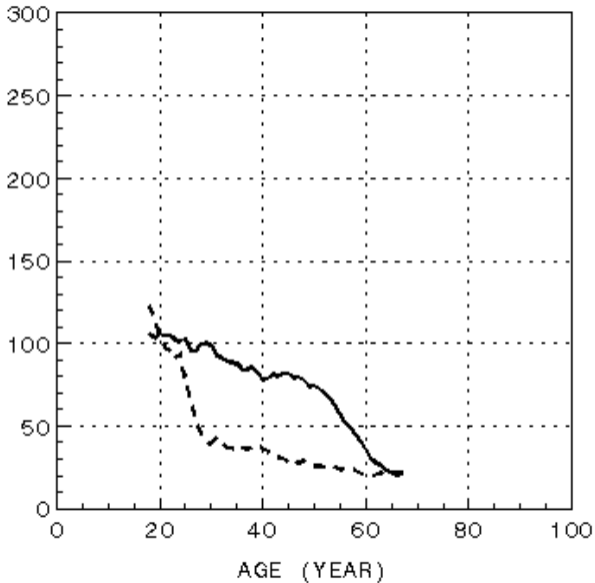

Supplement: MOESM3 [file 9481592]
